# Supplementary material for: Quantitative Structure-Activity Relationships Predicting the Antioxidant Potency of 17β-Estradiol-Related Polycyclic Phenols to Inhibit Lipid Peroxidation
Source: Int J Mol Sci. 2013 Jan 11;14(1):1443–54. doi: 10.3390/ijms14011443 (PMC3565329; doi:10.3390/ijms14011443)
Supplement: Supplementary File 1 — Supplemental Table (XLSX, 367 KB) [file ijms-14-01443-s001.xlsx]

## Sheet: Sheet1
Supplementary Table S1. Structure and antioxidant potency of the compounds,
together with the values of descriptors present in QSAR equations 1-8.
Chemical Sample	IC50 of LPO Inhibition (TBARS, mM)	BDE (kcal/mol)	log P	SIk1	SA (Å2)	HOMO Energy (eV)
A. Steroids
A.1. Human Estrogens
17b-Estradiol (E2, 1)	19.83	81.0475	4.008	13.648	269.898	-8.879
Estrone (E1, 2)	80.787	81.4342	4.535	13.648	268.298	-8.983
A.2. Synthetic Estrogen Isomers, Derivatives of Human Estrogens and Their Synthetic Isomers
3	9.167	80.7322	4.921	12.719	263.761	-8.898
4	20.88	81.7511	4.588	13.648	265.565	-8.592
5	6.725	81.2403	4.061	13.648	267.365	-8.45
6	4.922	80.6671	3.571	13.648	270.114	-8.5
7	3.132	80.7679	3.571	13.648	271.065	-8.596
8	4.763	80.1169	3.571	13.648	270.536	-8.446
9	3.279	79.7799	3.394	13.648	270.13	-8.339
10	29.465	81.0284	4.008	13.648	269.664	-8.986
11	26.115	80.9707	4.008	13.648	270.831	-8.919
12	11.024	80.6016	4.008	13.648	270.412	-8.842
13	23.95	81.0487	4.008	13.648	270.447	-8.879
14	9.701	80.5068	4.008	13.648	269.264	-8.787
15	8.951	81.0445	4.008	13.648	270.213	-8.903
16	7.028	79.3861	5.003	14.583	279.976	-8.881
17	9.215	80.737	5.003	14.583	279.103	-8.915
18	4.537	79.3785	4.475	14.583	282.277	-8.784
19	30.18	80.4211	4.147	14.583	277.071	-9.024
20	26.5	80.3986	4.147	14.583	275.622	-9.082
21	45.58	78.4314	4.283	15.523	290.061	-8.996
22	18.77	79.4239	3.755	15.523	295.903	-8.627
23	20.73	78.2013	3.755	15.523	292.241	-8.875
24	4.506	82.3826	4.778	16.467	317.431	-8.715
25	7.806	81.0097	4.467	16.467	311.348	-8.89
26	1.264	80.0472	5.268	16.467	319.486	-8.79
27	17.445	80.9939	4.904	16.467	311.055	-8.882
28	26.99	81.7858	4.098	16.467	310.393	-8.815
29	16.075	81.3543	6.051	16.194	314.768	-8.972
30	3.648	80.0242	5.911	17.416	319.931	-8.915
31	2.3065	82.5807	5.911	17.416	323.425	-8.874
32	10.171	81.1029	5.205	16.194	315.506	-8.908
33	1.033	79.3837	6.163	17.416	322.648	-8.832
34	4.913	79.5377	6.126	17.416	319.491	-8.852
35	2.488	80.0317	6.126	17.416	328.532	-8.865
36	1.9045	80.9581	5.383	17.416	326.621	-8.792
37	1.495	79.1042	5.635	17.416	323.174	-8.734
38	0.664	78.7843	5.635	17.416	324.131	-8.762
39	1.577	78.1846	5.635	17.416	324.069	-8.719
40	1.375	77.6055	6.63	18.367	333.316	-8.751
41	7.88	81.4152	4.916	18.056	344.017	-8.626
42	27.73	78.6948	4.8	14.583	289.071	-9.085
43	20.21	80.7701	4.8	14.583	287.239	-9.014
44	0.4077	80.4085	6.428	19.322	360.276	-8.776
45	3.12	79.9218	6.428	19.322	353.221	-8.777
46	1.415	78.9601	6.531	20.28	364.686	-8.738
47	14.885	81.4246	6.05	19.934	362.085	-8.94
48	10.47	80.903	6.512	21.24	388.624	-8.87
49	2.156	83.0971	5.407	19.668	374.447	-8.419
50	1.901	78.9749	6.5	18.56	371.112	-8.773
51	2.13	79.9623	6.201	20.878	386.61	-8.806
52	6.291	83.3864	5.265	14.583	296.858	-8.825
53	21.89	81.2275	5.265	14.583	292.378	-8.664
54	1.126	79.3631	6.831	19.468	369.955	-8.867
55	2.214	79.6389	6.232	21.825	405.382	-8.795
56	1.391	79.1474	6.304	19.468	372.301	-8.812
57	1.208	78.8888	6.304	19.468	371.465	-8.831
58	0.8952	78.532	6.303	19.468	372.811	-8.716
59	0.708	77.5834	7.298	20.38	381.95	-8.799
60	1.827	77.6637	7.563	22.217	417.304	-8.705
B. Non-steroidal compounds mimicking estrogen
61	16.59	82.5891	3.988	12.719	270.294	-8.343
62	1.369	78.8505	4.782	13.959	280.301	-8.779
63	7.398	80.1416	4.384	13.648	282.196	-8.398
64	1.5797	78.9656	4.813	14.917	298.976	-8.765
Diethylstilbestrol (DES, 65)	6.882	81.4666	4.794	16.372	288.997	-8.954
66	17.078	82.869	5.034	14.917	283.113	-9.214
67	5.332	82.6671	4.507	14.917	286.545	-9.137
68	1.5205	78.374	4.72	15.879	317.563	-8.734
69	18.6	80.638	5.615	16.467	324.623	-8.305
70	20.19	80.791	6.284	18.56	373.693	-8.254
